# Supplementary material for: Detoxification pathways of the phytoalexins brassilexin and sinalexin in Leptosphaeria maculans: isolation and synthesis of the elusive intermediate 3-formylindolyl-2-sulfonic acid
Source: Royal Society of Chemistry journal article supplement (doi:10.1039/b501907a), 2005-01-01
Supplement: b501907a.pdf [file b501907a.pdf]

Supplementary Material for Organic & Biomolecular Chemistry  
This journal is © The Royal Society of Chemistry 2005

**Supplementary data**

**Detoxification pathways of the phytoalexins brassilexin and sinalexin  
in *Leptosphaeria maculans*: isolation and synthesis of the elusive  
intermediate 3-formylindolyl-2-sulfonic acid**

M. Soledade C. Pedras\* and Mojmir Suchy

Department of Chemistry, University of Saskatchewan, 110 Science Place, Saskatoon SK S7N  
5C9, Canada

Corresponding author: M. Soledade C. Pedras

Department of Chemistry, University of Saskatchewan,  
110 Science Place, Saskatoon SK S7N 5C9, Canada

Telephone: (306) 966-4772

Fax: (306) 966-4730

E-mail: s.pedras@usask.ca

## Supplementary Information

**Supplementary data****General experimental procedures**

All chemicals were purchased from Sigma-Aldrich Canada Ltd., Oakville, ON. All solvents were HPLC grade and used as such, except for  $\text{CH}_2\text{Cl}_2$  and  $\text{CHCl}_3$ , that were redistilled and THF, which was dried by distillation over Na/benzophenone. Organic extracts were dried over  $\text{Na}_2\text{SO}_4$  and solvents removed under reduced pressure in a rotary evaporator. HPLC analysis was carried out with a high performance liquid chromatograph equipped with quaternary pump, automatic injector, and diode array detector (wavelength range 190 - 600 nm), degasser, and a Hypersil ODS column (5  $\mu\text{m}$  particle size silica, 4.6 i.d. $\times$ 200 mm), equipped with an in-line filter. Mobile phase A: 75%  $\text{H}_2\text{O}$  - 25%  $\text{CH}_3\text{CN}$  to 100%  $\text{CH}_3\text{CN}$ , for 35 min, linear gradient, and a flow rate 1.0 ml/min; B: 100%  $\text{H}_2\text{O}$  for 10 minutes, then linear gradient to 50%  $\text{H}_2\text{O}$ -50%  $\text{CH}_3\text{CN}$  for 15 minutes, flow rate 1 ml/min. Fourier transform IR spectra were obtained on Bio-Rad FTS-40 spectrometer in KBr. NMR spectra were recorded on Bruker Avance 500 spectrometers; for  $^1\text{H}$  (500 MHz),  $\delta$  values were referenced as follows  $\text{CDCl}_3$  ( $\text{CHCl}_3$ , 7.23 ppm),  $\text{CD}_3\text{CN}$  ( $\text{CHD}_2\text{CN}$ , 1.94 ppm),  $\text{CD}_3\text{SOCD}_3$  ( $\text{CD}_3\text{SOCHD}_2$ , 2.50 ppm); for  $^{13}\text{C}$  (125 MHz)  $\text{CDCl}_3$  (77.23 ppm),  $\text{CD}_3\text{CN}$  (1.39 and 118.69 ppm),  $\text{CD}_3\text{SOCD}_3$  (39.51 ppm). Mass spectra (MS) were obtained on a VG 70 SE and Q Star XL Applied Biosystems mass spectrometers.

## Supplementary Information

## Syntheses

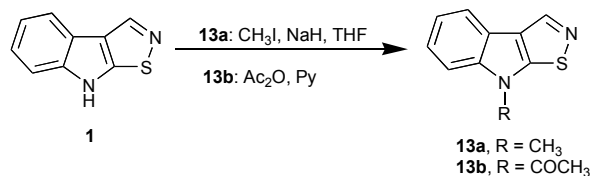

**Scheme 6.** Synthesis of 8-substituted brassilexins **13a** and **13b**.

**Synthesis of 8-methylbrassilexin (13a, Scheme 6).** NaH (60% suspension in mineral oil, 17 mg, 0.5 mmol) was added to a solution of brassilexin (**1**, 44 mg, 0.25 mmol) in dry THF (2 ml) and the mixture was allowed to stir at room temperature. After 10 minutes, MeI (30  $\mu$ l, 0.5 mmol) was added and stirring was allowed to continue for further 60 min at room temperature. The mixture was then diluted with 1 M HCl (20 ml) and extracted with EtOAc. The combined organic extract was dried, the solvent was evaporated and the residue was chromatographed (SiO<sub>2</sub>, hexane-acetone, 5:1) to afford 8-methylbrassilexin (**13a**) as a brownish solid (47 mg, 100%). Mp. 67-69 °C; HPLC  $R_t$  = 17.0 min.  $\nu_{\max}$ (KBr)/cm<sup>-1</sup> 3048, 1648, 1490, 1464, 1319, 1261, 912 and 743.  $\delta_{\text{H}}$ (500 MHz; CD<sub>3</sub>CN) 3.87 (s, 3H); 7.26 (dd,  $J$  = 8, 8 Hz, 1H); 7.40 (dd,  $J$  = 8, 8 Hz, 1H); 7.48 (d,  $J$  = 8 Hz); 7.93 (d,  $J$  = 8 Hz); 8.71 (s, 1H).  $\delta_{\text{C}}$ (125 MHz; CD<sub>3</sub>CN) 34.2 (q), 111.4 (d), 121.4 (s), 121.5 (d), 121.8 (d), 125.0 (d), 127.0 (s), 146.2 (s), 149.4 (d), 163.2 (s). HRMS (EI) calc. for C<sub>10</sub>H<sub>8</sub>N<sub>2</sub>S (M<sup>+</sup>) 188.0408, found 188.0408. MS-EI,  $m/z$  188 (M<sup>+</sup>, 100%), 155 (15), 146 (11).

## Supplementary Information

**Synthesis of 8-acetylbrassilexin (13b)**, Scheme 6). Ac<sub>2</sub>O (0.1 ml, 1 mmol) was added to a solution of brassilexin (**1**, 17 mg, 0.10 mmol) in pyridine (0.2 ml) and the mixture was stirred at room temperature. After 2 hours the reaction mixture was diluted with 1 M HCl and allowed to stand at 3 °C for 60 min. The precipitate was filtered off, was washed with water and allowed to dry to yield 8-acetylbrassilexin (**13b**) as a white solid (16 mg, 73%). Mp. 179-180 °C (crystallization from CH<sub>2</sub>Cl<sub>2</sub>-hexane, lit.<sup>1</sup> 172 – 176 °C). HPLC  $R_t$  = 15.4 min.  $\nu_{\max}(\text{KBr})/\text{cm}^{-1}$  2927, 1691, 1480, 1376, 1300, 1200, 1018 and 755.  $\delta_{\text{H}}(500 \text{ MHz}; \text{DMSO-D}_6)$  2.90 (s, 3H); 7.45 (dd,  $J = 8, 8 \text{ Hz}$ , 1H); 7.50 (dd,  $J = 8, 8 \text{ Hz}$ , 1H); 8.03 (m, 2H); 8.94 (s, 1H).  $\delta_{\text{C}}(125 \text{ MHz}; \text{DMSO-D}_6)$  24.4 (q), 115.4 (d), 120.7 (d), 122.6 (s), 124.0 (d), 125.4 (d), 127.5 (s), 140.1 (s), 147.2 (d), 157.1 (s), 168.1 (s). HRMS (APCI) calc. for C<sub>11</sub>H<sub>9</sub>N<sub>2</sub>OS (M+H<sup>+</sup>) 217.0430, found 217.0430.

**Spectral data for brassilexin (1)**. Mp. 172-173 °C (lit.<sup>1</sup> 164-167 °C); HPLC  $R_t$  = 13.0 min;  $\nu_{\max}(\text{KBr})/\text{cm}^{-1}$  3389, 3072, 1647, 1505, 1464, 1369, 1239 and 740.  $\delta_{\text{H}}(500 \text{ MHz}; \text{CD}_3\text{CN})$  7.23 (dd,  $J = 8, 8 \text{ Hz}$ , 1H); 7.33 (dd,  $J = 8, 8 \text{ Hz}$ , 1H); 7.56 (d,  $J = 8 \text{ Hz}$ ); 7.91 (d,  $J = 8 \text{ Hz}$ ); 8.69 (s, 1H); 9.85 (br s, D<sub>2</sub>O exch., 1H).  $\delta_{\text{C}}(125 \text{ MHz}; \text{CD}_3\text{CN})$  112.5 (d), 120.2 (d), 120.4 (s), 120.9 (d), 124.1 (d), 127.7 (s), 144.6 (s), 147.8 (d), 159.5 (s). HRMS (EI) calc. for C<sub>9</sub>H<sub>6</sub>N<sub>2</sub>S (M<sup>+</sup>) 174.0252, found 174.0252. MS-EI,  $m/z$  174 (M<sup>+</sup>, 100%), 142 (16), 120 (11).

---

<sup>1</sup> M. Devys, M. Barbier, I. Loiselet, T. Rouxel, A. Sarniguet, A. Kollmann and J. F. Bousquet, *Tetrahedron Lett.*, 1988, **29**, 6447.

## Supplementary Information

**Spectral data for sinalexin (2).** HPLC  $R_t = 20.1$  min;  $\nu_{\max}$  (KBr)/ $\text{cm}^{-1}$  2935, 1660, 1500, 1472, 1436, 1251 and 751.  $\delta_{\text{H}}$ (500 MHz;  $\text{CD}_3\text{CN}$ ) 4.17 (s, 3H); 7.32 (dd,  $J = 8, 8$  Hz, 1H); 7.45 (dd,  $J = 8, 8$  Hz, 1H); 7.59 (d,  $J = 8$  Hz); 7.94 (d,  $J = 8$  Hz); 8.73 (s, 1H).  $\delta_{\text{C}}$ (125 MHz;  $\text{CD}_3\text{CN}$ ) 65.8 (q), 110.8 (d), 121.9 (d), 123.0 (d), 125.3 (s), 125.8 (s), 142.8 (s), 149.6 (d), 157.3 (s). HRMS (EI) calc. for  $\text{C}_{10}\text{H}_8\text{N}_2\text{OS}$  ( $\text{M}^+$ ) 204.0356, found 204.0355. MS-EI,  $m/z$  204 ( $\text{M}^+$ , 87%), 173 (100), 149 (43), 129 (24), 102 (13).

**Spectral data for 3-aminomethyleneindole-2-thione (8).** Mp. 197-200 °C; HPLC  $R_t = 8.4$  min;  $\nu_{\max}$ (KBr)/ $\text{cm}^{-1}$  3238, 3128, 1641, 1446, 1398, 1210 and 739.  $\delta_{\text{H}}$  (500 MHz;  $\text{CD}_3\text{CN}$ ) 7.10 (m, 3H); 7.33 (br s,  $\text{D}_2\text{O}$  exch., 1H); 7.49 (d,  $J = 8$  Hz, 1H); 8.28 (m, 1H); 9.85 (br s,  $\text{D}_2\text{O}$  exch., 1H); 11.04 (br s,  $\text{D}_2\text{O}$  exch., 1H).  $\delta_{\text{C}}$ (125 MHz;  $\text{CD}_3\text{CN}$ ) 108.2 (s), 110.4 (d), 115.9 (d), 122.4 (d), 124.3 (d), 129.4 (s), 139.0 (s), 151.2 (d), 179.0 (s). HRMS (EI) calc. for  $\text{C}_9\text{H}_8\text{N}_2\text{S}$  ( $\text{M}^+$ ) 176.0408, found 176.0412. MS-EI,  $m/z$  176 ( $\text{M}^+$ , 100%), 149 (46), 117 (11).

**Spectral data for 3-aminomethylene-1-methoxyindole-2-thione (14).** Mp. 104-106 °C; HPLC  $R_t = 13.4$  min.  $\nu_{\max}$ (KBr)/ $\text{cm}^{-1}$  3263, 3112, 1641, 1341, 1214 and 740.  $\delta_{\text{H}}$ (500 MHz;  $\text{CDCl}_3$ ) 4.19 (s, 3H); 6.18 (br s,  $\text{D}_2\text{O}$  exch., 1H); 7.16 (m, 1H); 7.23 (m, 2H); 7.41 (d,  $J = 8$  Hz, 1H); 8.10 (m, 1H); 11.15 (br s,  $\text{D}_2\text{O}$  exch., 1H).  $\delta_{\text{H}}$ (500 MHz;  $\text{CD}_3\text{CN}$ ) 4.11 (s, 3H); 7.15 (dd,  $J = 8, 8$  Hz, 1H); 7.23 (m, 2H); 7.37 (br s,  $\text{D}_2\text{O}$  exch., 1H); 7.56 (d,  $J = 8$  Hz, 1H); 8.28 (m, 1H); 10.99 (br s,  $\text{D}_2\text{O}$  exch., 1H).  $\delta_{\text{C}}$ (125 MHz;  $\text{CDCl}_3$ ) 63.3 (q), 105.2 (s), 107.8 (d), 115.2 (d), 122.9 (d), 124.0 (s),

## Supplementary Information

124.2 (d), 135.5 (s), 147.9 (d), 172.1 (s). HRMS (EI) calc. for  $C_{10}H_{10}N_2OS$  ( $M^+$ ) 206.0512, found 206.0514. MS-EI,  $m/z$  206 ( $M^+$ , 100%), 174 (27), 148 (40).

**Spectral data for 3-aminomethylene-1-methylindole-2-thione (15).** Mp. 126-128 °C; HPLC  $R_t$  = 15.0 min.  $\nu_{\max}(\text{KBr})/\text{cm}^{-1}$  3248, 3093, 1643, 1427, 1321, 1232, 1088 and 743.  $\delta_{\text{H}}(500 \text{ MHz}; \text{CDCl}_3)$  3.75 (s, 3H); 6.03 (br s,  $\text{D}_2\text{O}$  exch., 1H); 7.14 (m, 2H); 7.22 (dd,  $J = 8, 8 \text{ Hz}$ , 1H); 7.41 (d,  $J = 8 \text{ Hz}$ , 1H); 8.10 (m, 1H); 11.27 (br s,  $\text{D}_2\text{O}$  exch., 1H).  $\delta_{\text{C}}(125 \text{ MHz}; \text{CDCl}_3)$  29.5 (q), 108.5 (s), 109.2 (d), 115.0 (d), 122.3 (d), 124.0 (d), 127.4 (s), 140.4 (s), 147.0 (d), 178.8 (s). HRMS (EI) calc. for  $C_{10}H_{10}N_2S$  ( $M^+$ ) 190.0565, found 190.0566. MS-EI,  $m/z$  190 ( $M^+$ , 100%), 174 (10), 157 (16), 130 (11), 95 (6).
